# Supplementary material for: Identification of Renoprotective Phytosterols from Mulberry (Morus alba) Fruit against Cisplatin-Induced Cytotoxicity in LLC-PK1 Kidney Cells
Source: MDPI journal article supplement (doi:10.3390/plants10112481), 2021-11-17
Supplement: s1 [file s1]

## Supplementary Materials

# Identification of Renoprotective Phytosterols from Mulberry (*Morus alba*) Fruit against Cisplatin-Induced Cytotoxicity in LLC-PK1 Kidney Cells

Dahae Lee <sup>1,†</sup>, Seoung Rak Lee <sup>2,†</sup>, Bang Ju Park <sup>3</sup>, Ji Hoon Song <sup>4</sup>, Jung Kyu Kim <sup>5</sup>, Yuri Ko <sup>6</sup>,  
Ki Sung Kang <sup>1,\*</sup> and Ki Hyun Kim <sup>2,6,\*</sup>

<sup>1</sup> College of Korean Medicine, Gachon University, Seongnam 13120, Korea; pjsldh@gachon.ac.kr

<sup>2</sup> School of Pharmacy, Sungkyunkwan University, Suwon 16419, Korea; seungrak@princeton.edu

<sup>3</sup> Department of Electronic Engineering, Gachon University, Seongnam 13120, Korea;  
sooyong1320@gachon.ac.kr

<sup>4</sup> Jeju Institute of Korean Medicine, Jeju 63309, Korea; jhsong@jikom.or.kr

<sup>5</sup> School of Chemical Engineering, Sungkyunkwan University, Suwon 16419, Korea; legkim@skku.edu

<sup>6</sup> Department of Biological Chemistry and Molecular Pharmacology, Harvard Medical School,  
Boston, MA 02115, USA; koyr0120@gmail.com

\* Correspondence: kkang@gachon.ac.kr (K.S.K.); khkim83@skku.edu (K.H.K.);  
Tel.: +82-31-750-5402 (K.S.K.); +82-31-290-7700 (K.H.K.)

† These authors contributed equally to this study.

**Figure S1.**  $^1\text{H}$  NMR spectrum of compound **1** (in  $\text{CDCl}_3$ ).

**Figure S2.**  $^{13}\text{C}$  NMR spectrum of compound **1** (in  $\text{CDCl}_3$ ).

**Figure S3.**  $^1\text{H}$  NMR spectrum of compound **2** (in  $\text{CDCl}_3$ ).

**Figure S4.**  $^{13}\text{C}$  NMR spectrum of compound **2** (in  $\text{CDCl}_3$ ).

**Figure S5.**  $^1\text{H}$  NMR spectrum of compound **3** (in  $\text{CD}_3\text{OD}$ ).

**Figure S6.**  $^{13}\text{C}$  NMR spectrum of compound **3** (in  $\text{CD}_3\text{OD}$ ).

**Figure S7.**  $^1\text{H}$  NMR spectrum of compound **4** (in  $\text{CDCl}_3$ ).

**Figure S8.**  $^{13}\text{C}$  NMR spectrum of compound **4** (in  $\text{CDCl}_3$ ).

**Figure S9.**  $^1\text{H}$  NMR spectrum of compound **5** (in  $\text{CD}_3\text{OD}$ ).

**Figure S10.**  $^{13}\text{C}$  NMR spectrum of compound **5** (in  $\text{CD}_3\text{OD}$ ).

**Figure S11.**  $^1\text{H}$  NMR spectrum of compound **6** (in  $\text{CD}_3\text{OD}$ ).

**Figure S12.**  $^{13}\text{C}$  NMR spectrum of compound **6** (in  $\text{CD}_3\text{OD}$ ).

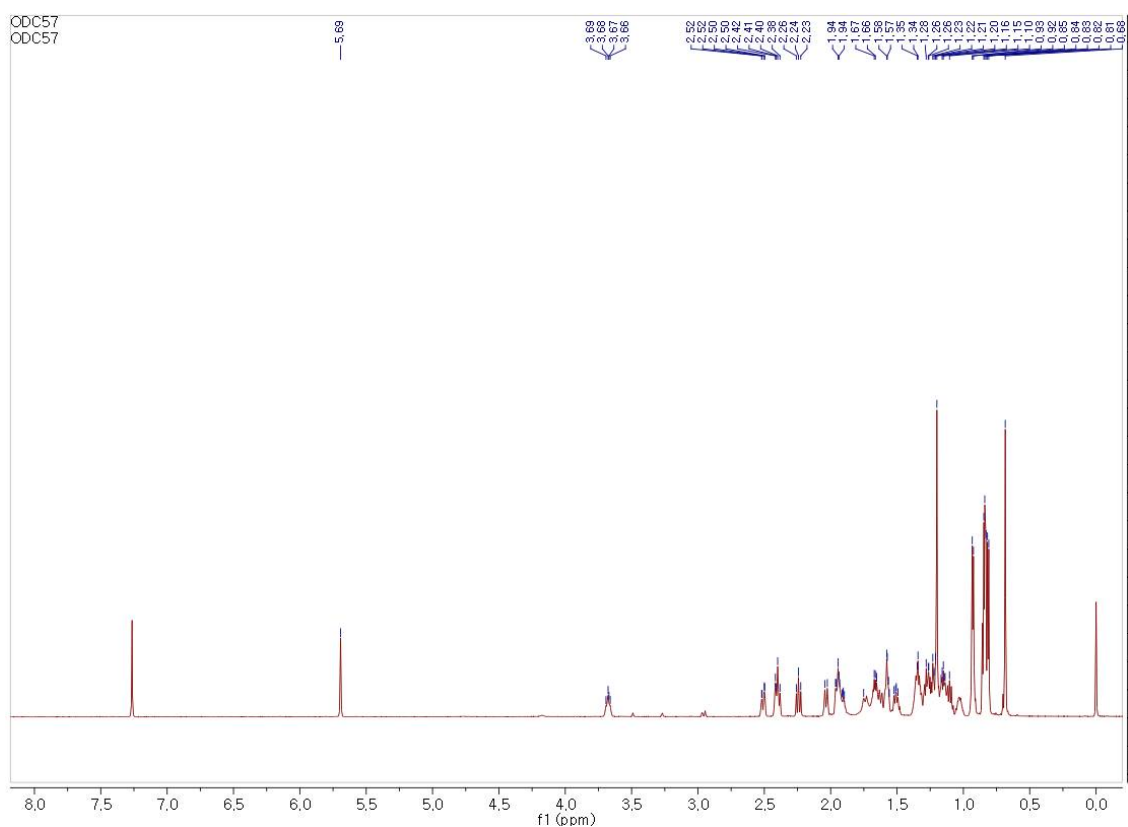

**Figure S1.**  $^1\text{H}$ -NMR spectrum of compound **1** (in  $\text{CDCl}_3$ ).

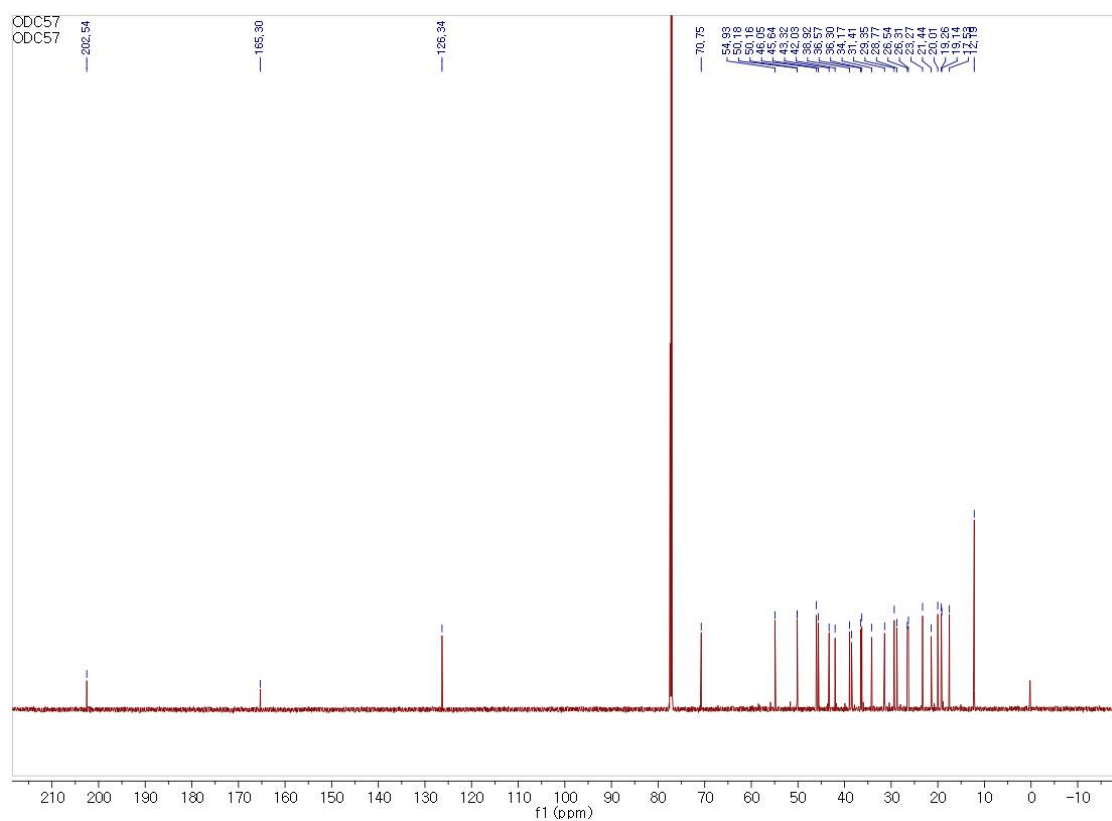

**Figure S2.**  $^{13}\text{C}$ -NMR spectrum of compound **1** (in  $\text{CDCl}_3$ ).

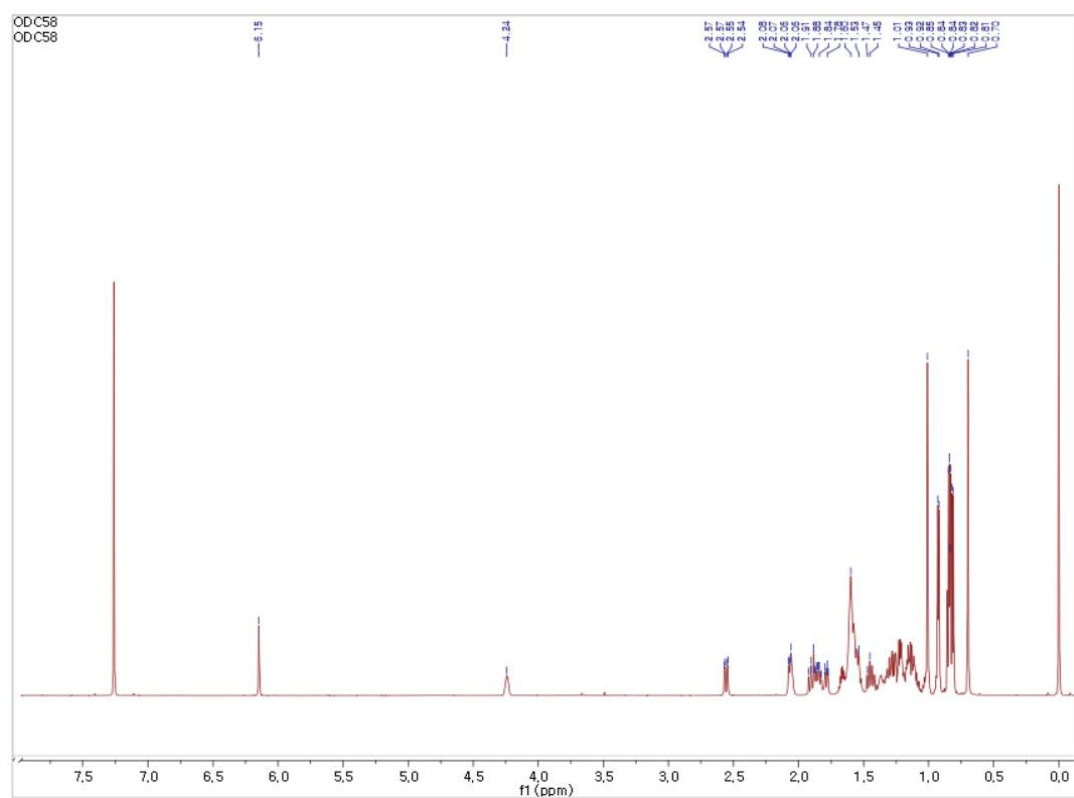

**Figure S3.**  $^1\text{H}$ -NMR spectrum of compound **2** (in  $\text{CDCl}_3$ ).

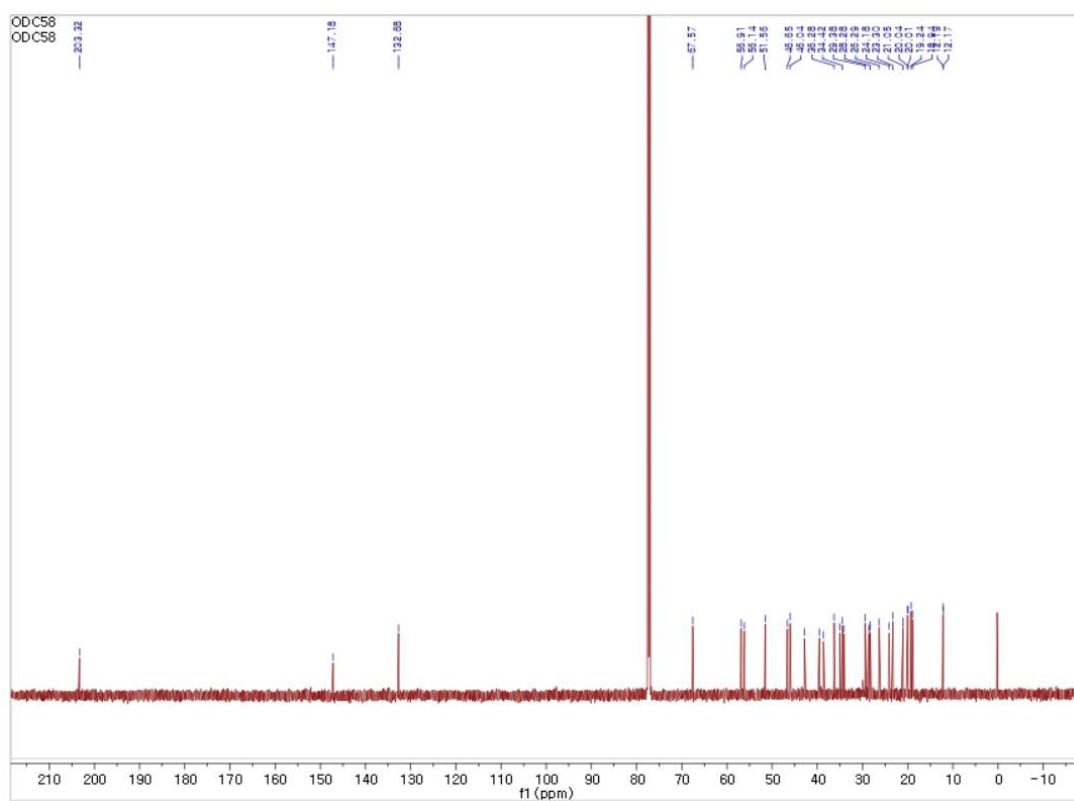

**Figure S4.**  $^{13}\text{C}$ -NMR spectrum of compound **2** (in  $\text{CDCl}_3$ ).

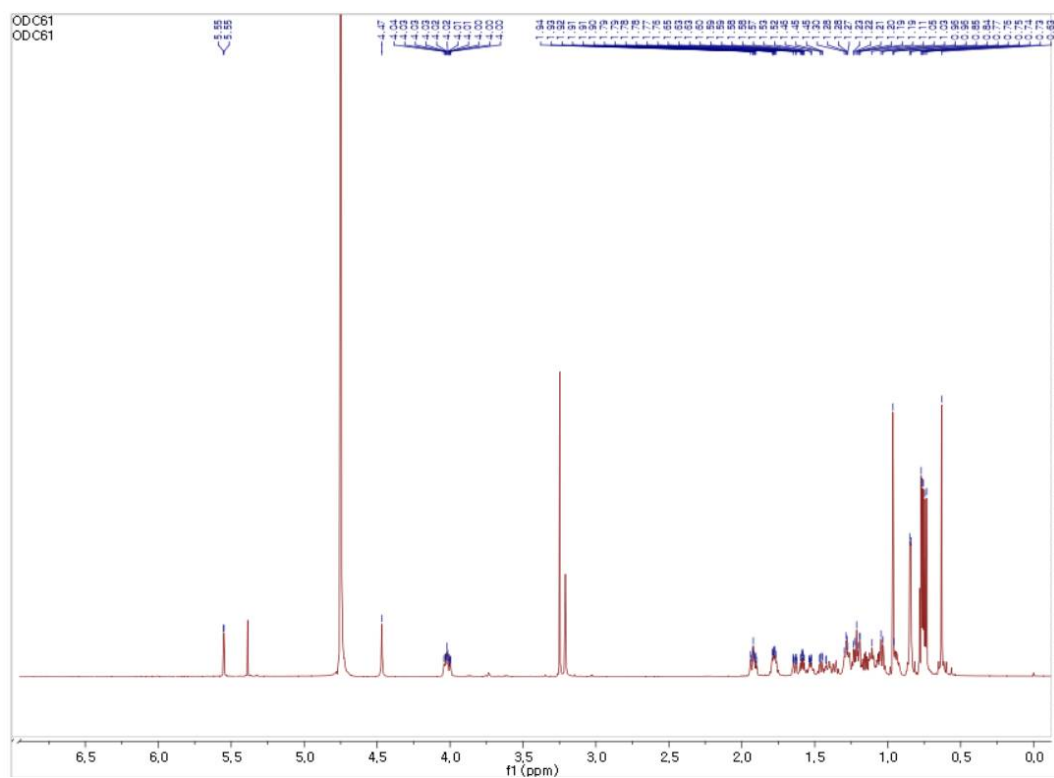

**Figure S5.**  $^1\text{H}$ -NMR spectrum of compound **3** (in  $\text{CD}_3\text{OD}$ ).

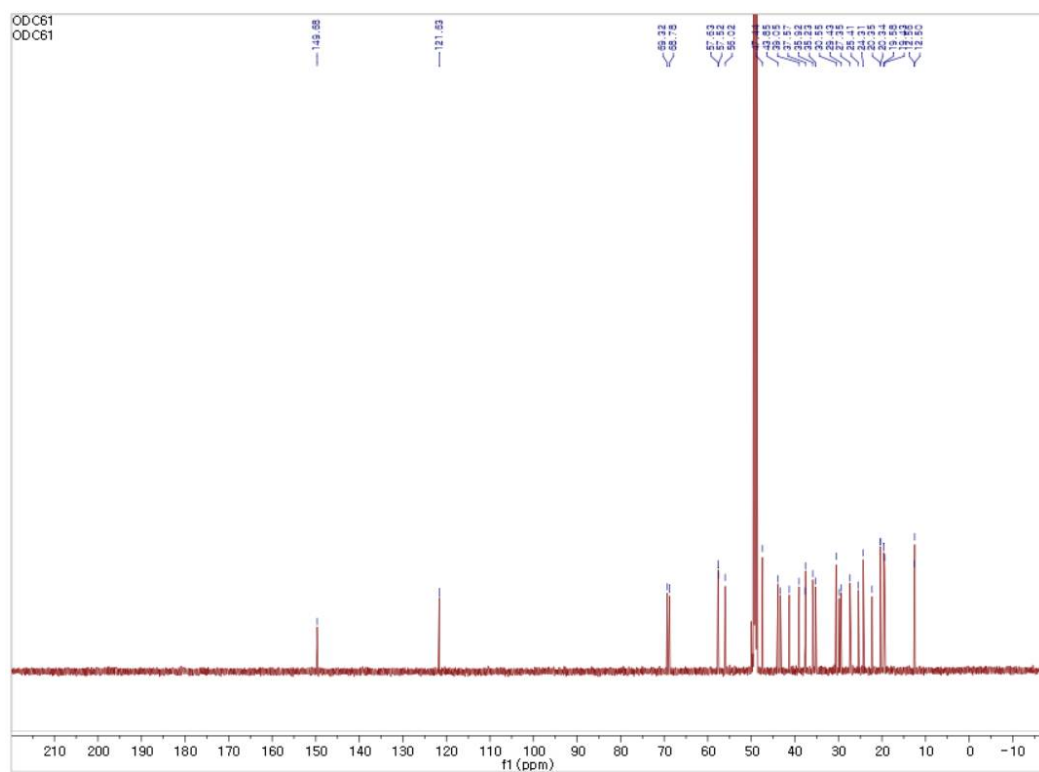

**Figure S6.**  $^{13}\text{C}$ -NMR spectrum of compound **3** (in  $\text{CD}_3\text{OD}$ ).

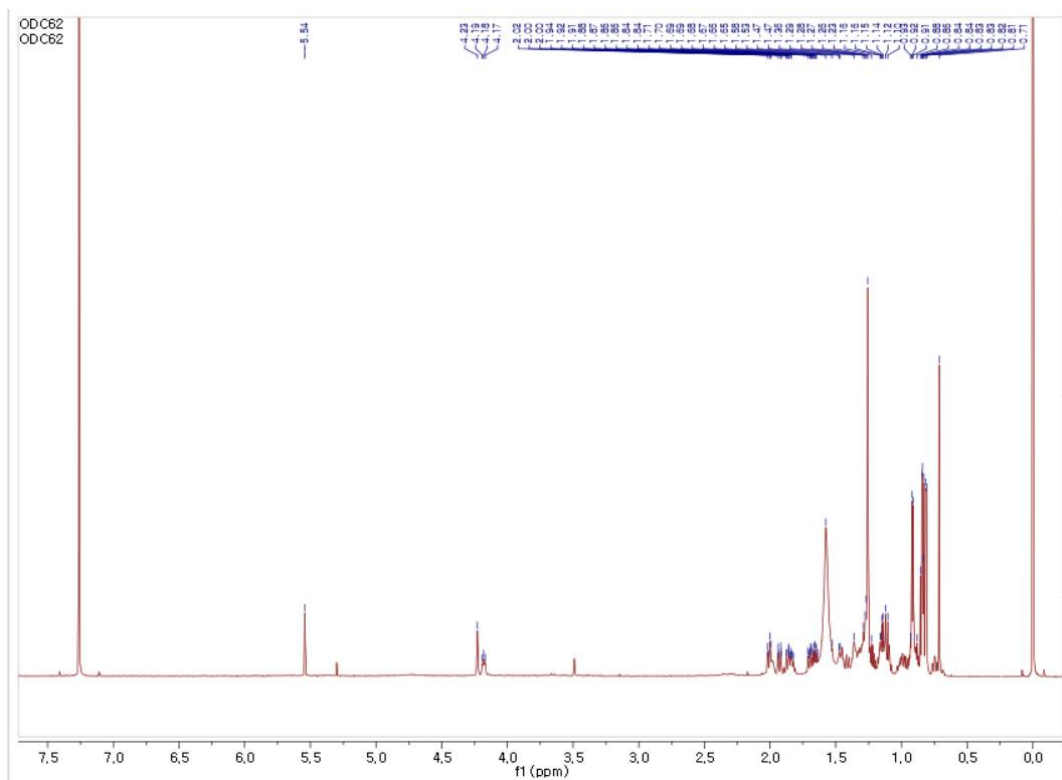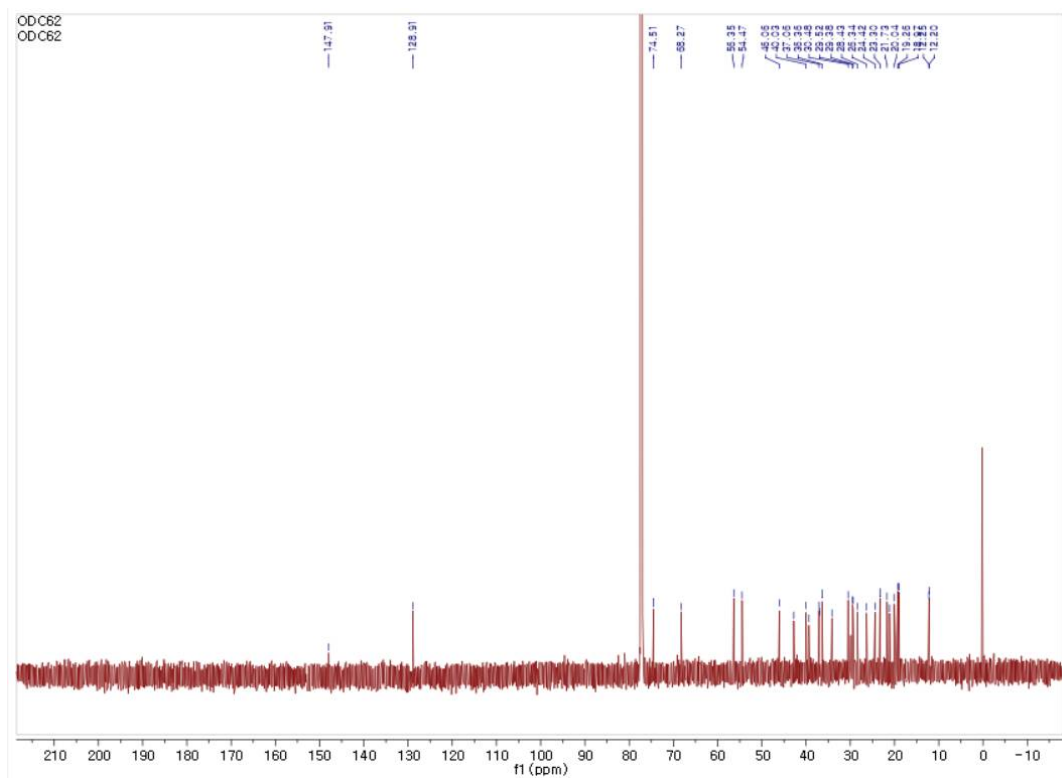

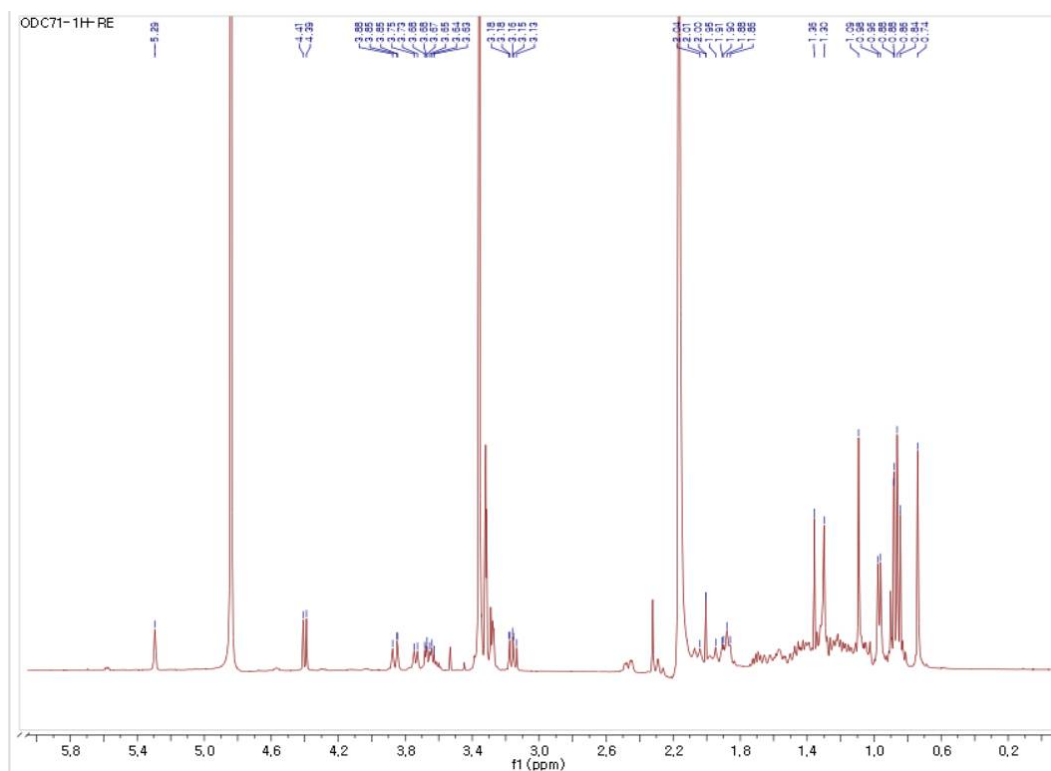

**Figure S9.**  $^1\text{H}$ -NMR spectrum of compound **5** (in  $\text{CD}_3\text{OD}$ ).

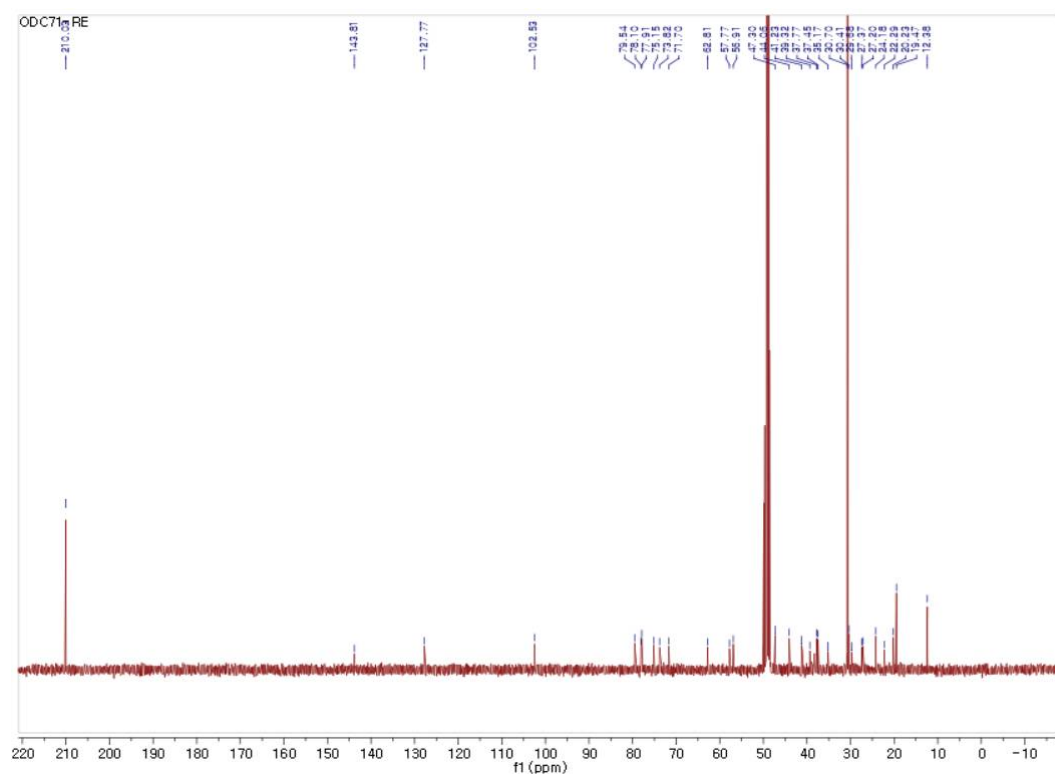

**Figure S10.**  $^{13}\text{C}$ -NMR spectrum of compound **5** (in  $\text{CD}_3\text{OD}$ ).

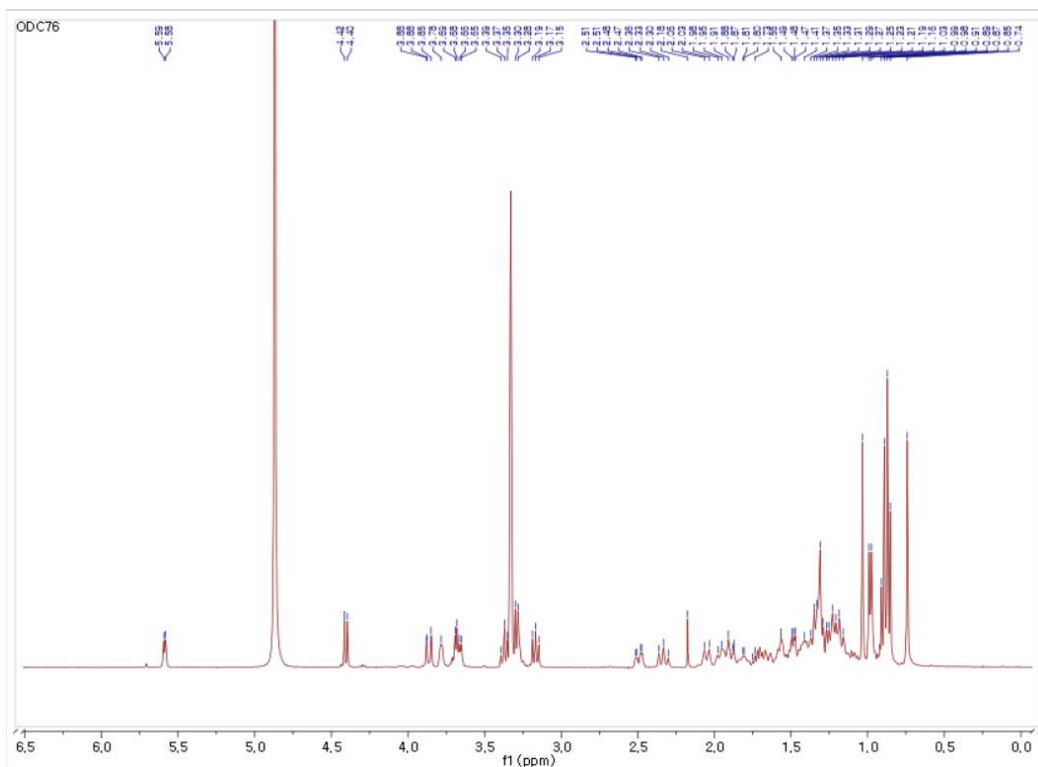

**Figure S11.**  $^1\text{H}$ -NMR spectrum of compound **6** (in  $\text{CD}_3\text{OD}$ ).

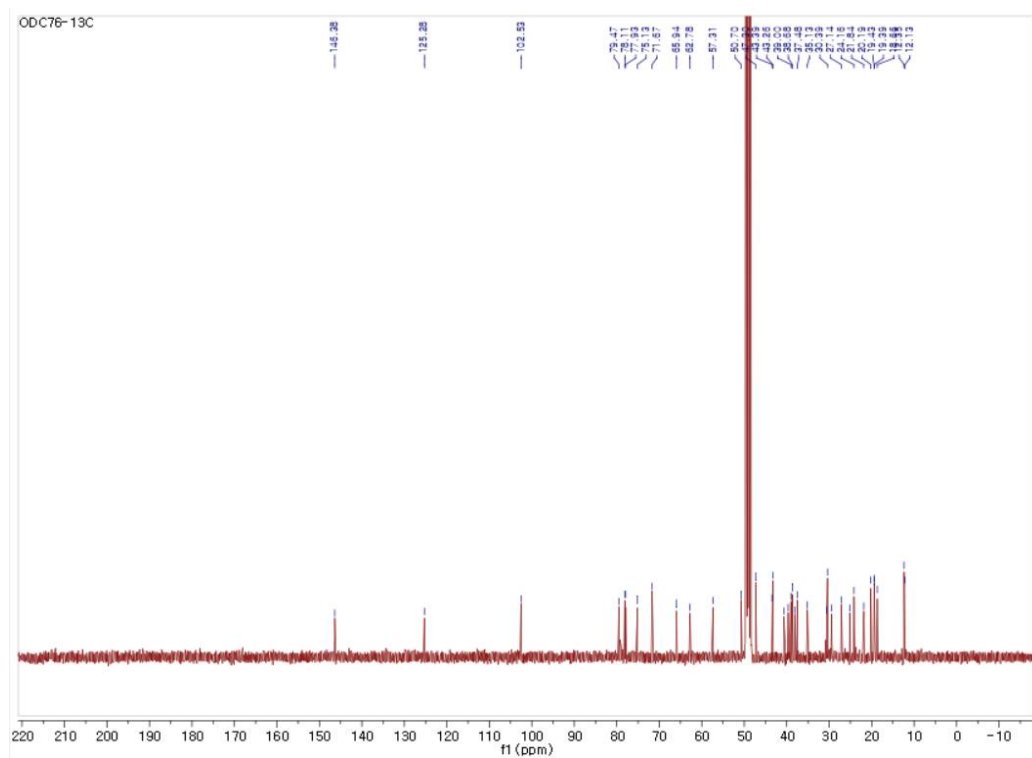

**Figure S12.**  $^{13}\text{C}$ -NMR spectrum of compound **6** (in  $\text{CD}_3\text{OD}$ ).
